# Supplementary material for: Carbon dioxide plume dispersion simulated at hectometer scale using DALES: model formulation and observational evaluation
Source: Copernicus journal article supplement (doi:10.5194/egusphere-2024-3721), 2024-12-03
Supplement: Supplementary file [file egusphere-2024-3721-AC2-supplement.pdf]

## Response to review 2

Dear Referee,

Thank you for your detailed and constructive comments aimed at improving our manuscript. We appreciate the time and effort you have taken to provide thoughtful feedback. Below, we provide our detailed responses to your comments (in blue):

**The manuscript entitled: "Carbon dioxide plume dispersion simulated at hectometer scale using DALES: model formulation and observational evaluation" by Karagodin-Doyennel et al., is a comprehensive study in which CO<sub>2</sub> mole fractions for a domain in The Netherlands (NL) were simulated using DALES, an LES model that runs at 100x100 m. Anthropogenic emissions (traffic, power, agriculture, residential, among others) and biogenic fluxes are added to the LES framework, so all flux components contributing to total CO<sub>2</sub> mole fractions are taken care of. A specific processing pipeline is described for the downscaling of anthropogenic emissions to achieve the desired spatial scale. Finally, the CAMS air quality forecast is used as the CO<sub>2</sub> background for the LES domain. The evaluation is done at 3 sites in the NL: Cabauw, Slufter and Westmaas using simulated tagged tracers to investigate the main drivers of variability at each site. There is quite some work on this study, the Figures are very well produced and overall the paper is well-written. However, the following are major points for improvement that the authors should consider before the article is accepted for publication:**

### General Comments

**1. The article is presented with a lot of focus on anthropogenic emissions, which makes sense given the motivation in the Introduction hinting at the Paris agreement, emission reductions, etc. Therefore, the effort put on Section 2, preparing the SNAP categories, adjusting the point and diffuse area sources, downscaling emissions, plume rise, etc., is justified and well explained. However, in the Results from Figure 7 to 10, I was surprised that the authors do not have a single tracer with Anthropogenic emissions or even multiple tracers for each SNAP category. Instead, they show CO<sub>2</sub>bg, CO<sub>2</sub>sum, and CO<sub>2</sub>NEE with no opportunity to evaluate the individual contribution of the anthropogenic emissions. This is somewhat contradicting the set and setting given in the Introduction and all the effort done processing the emissions. Why not showing at least the CO<sub>2</sub>bg\_emiss?**

**Response:** We appreciate the referee's comment and agree that a time series including all anthropogenic emissions is missing. To enhance clarity, we have now added this time series to better illustrate the contribution of anthropogenic emissions (See Figures 8 and 10).

However, our model setup does not include tracers for individual SNAP categories, as doing so would significantly increase computational demands for both simulation and

storage. While our current implementation does not feature a sector-specific breakdown, it can be adapted for future studies focusing on specific emission sources.

A detailed analysis of individual emission categories is beyond the scope of this work but is planned for a follow-up study. Therefore, in this study, we limit our focus to the combined emissions time series. The new figures are provided below:

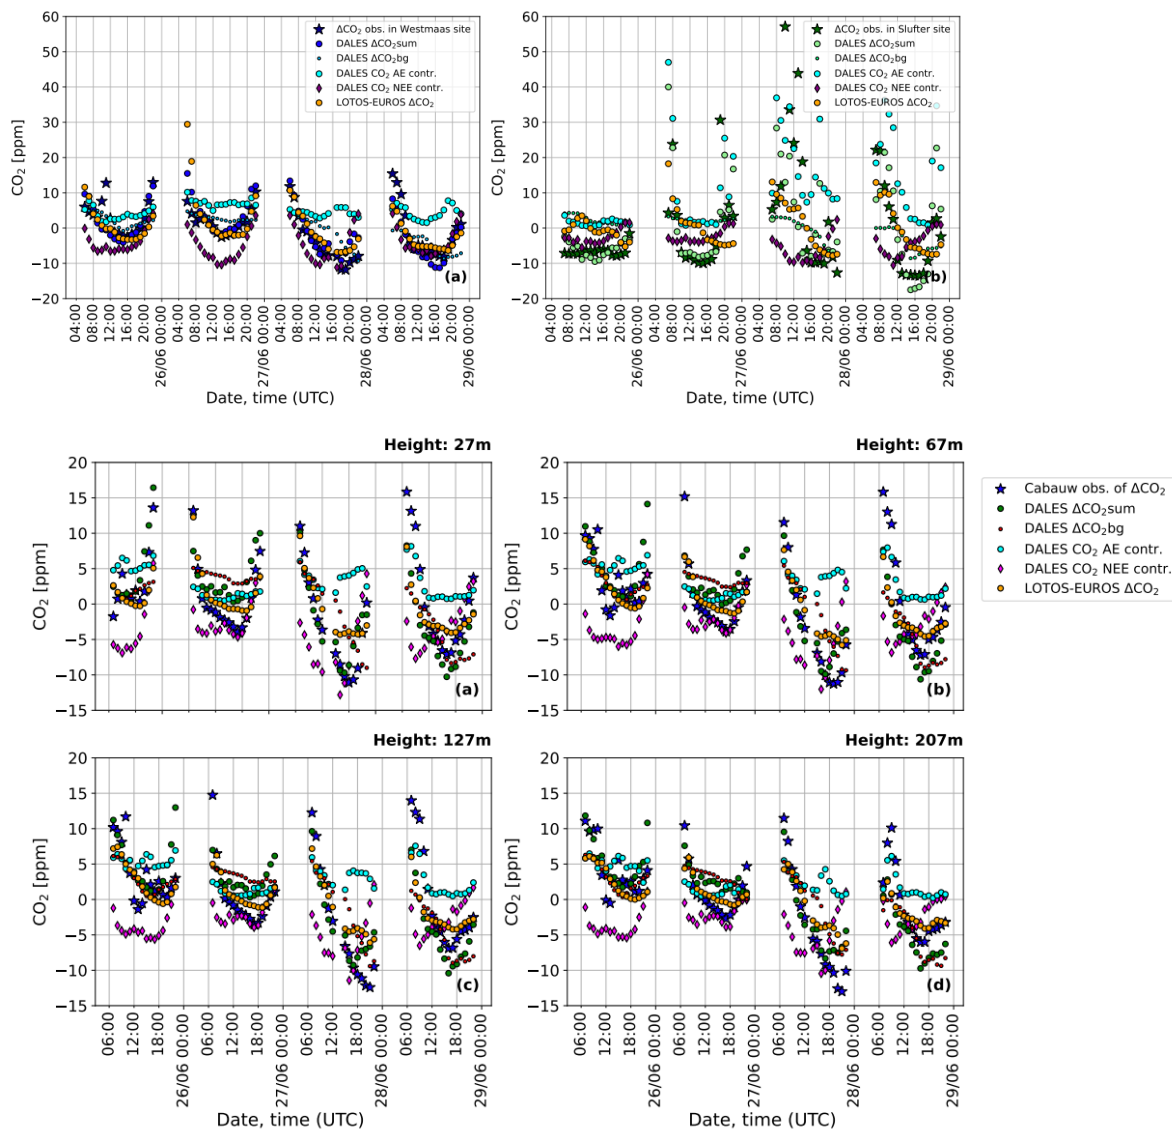

The subtraction of the mean level over the period remains for observations, BG, and CO<sub>2</sub> sum tracers from DALES, as well as for LE CO<sub>2</sub> data. Additionally, we separately provide time series for NEE and anthropogenic CO<sub>2</sub> contributions (DALES CO<sub>2</sub> AE contr.).

**2. The use of CAMS as background is one of my major concerns. First, it is not entirely clear which CAMS product is used, the link provided ends up in the ADS website and from there several products providing CO<sub>2</sub> mole fractions can be used, for example: CAMS global greenhouse gas forecasts, CAMS global**

greenhouse gas reanalysis (EGG4) or CAMS global inversion-optimised greenhouse gas fluxes and concentrations. Second, as I suspect the forecast was used, for the modelling exercise the authors are performing they should show that the background does a good job in background stations and for this study in continental stations. From my experience at other latitudes, the CAMS forecast is biased low and likely would have an offset for your domain as well. I suggest to investigate this further and if needed bias correct the CAMS background used. The situation that the authors are simulating, with northeasterly winds will bring signals from the Groningen Gas Field, likely bringing CO<sub>2</sub> signals that will be present in the observations but not in CAMS (I think). You can, for example, compare CAMS CO<sub>2</sub> at Cabauw and at a background stations, like Mace Head (Ireland) and from there calculate a bias, if any, and correct your CO<sub>2</sub> tracer. But this analysis, leading or not to a bias correction, should be shown in Supplementary material.

**Response:** We thank the referee for valuable feedback on the use of CAMS data in our study. We acknowledge that there are several CAMS products providing CO<sub>2</sub> mole fractions with different quality, and it is important to clarify which product was used in our analysis.

The CAMS data we used are from the CAMS global greenhouse gas reanalysis (EGG4) product, which provides a refined, post-processed dataset that offers more accurate representation of greenhouse gases in the atmosphere with higher spatial resolution than other products. This product is based on delayed mode analysis, which ensures that some biases from real-time forecasts are corrected in the reanalysis version. We have added this to the main text (see L189-194)

Based on our experience and the geographic location of the study, we suspect there may be a low bias in the CAMS CO<sub>2</sub> predictions for the domain, as noted by the reviewer. Yet, as stated in the ECMWF report ([https://confluence.ecmwf.int/display/CKB/CAMS%3A+Reanalysis+data+documentation#CAMS:Reanalysisdatadocumentation-CAMSglobalreanalysis\(EAC4\)Parameterlistings](https://confluence.ecmwf.int/display/CKB/CAMS%3A+Reanalysis+data+documentation#CAMS:Reanalysisdatadocumentation-CAMSglobalreanalysis(EAC4)Parameterlistings)), the fossil CO<sub>2</sub> emissions are included in EGG4. Thus, any effect from outside, like Groningen Gas Field emissions should be included in the CAMS data (Yet, based on previous assessments, the Groningen Gas Field has only a small contribution to fossil CO<sub>2</sub> emissions for recent years as the gas is not burned there but transported elsewhere).

Thus, the main concern that we mentioned in the paper, is the temporal resolution of the CAMS EGG4 dataset, which is 6 hours, which may cause significant errors at locations with an important contribution of the background to the local CO<sub>2</sub> variability (like at Cabauw). Besides, the horizontal resolution is also quite coarse (15 km) potentially affecting the background variability. Yet, we agree that there are more refined CAMS products, e.g. with optimized fluxes, but unfortunately the spatiotemporal resolution of these data is low.

Concerning the identification of biases at background stations: for the CAMS global greenhouse gas reanalysis (EGG4) product this analysis has been done already by ECMWF (e.g., [https://atmosphere.copernicus.eu/sites/default/files/publications/CAMS2\\_82\\_2023SC2\\_D82.4.2.2-2024\\_EGG4\\_2003\\_2023\\_v1.2.pdf](https://atmosphere.copernicus.eu/sites/default/files/publications/CAMS2_82_2023SC2_D82.4.2.2-2024_EGG4_2003_2023_v1.2.pdf)). They report a positive bias at mid to high latitude stations like Alert and Barrow reaching up to 2.5% in recent years. This is assumed to be caused by underestimation of the carbon uptake in summer season. These biases are depicted in the Figure 3.1.1 and Figure 3.1.3 of the report. We have mentioned these biases in the discussion (see L534-538 and L593-597).

3. Length of article and structure. As I said before, there is a lot of work done here, but the reader probably does not want to read all about it, so I suggest to shorten the article and change the structure. In the Methods, I suggest to start with the DALES description and then continue with the emission preprocessing. In the Results, I strongly suggest to show the evaluation at the three sites all together, or start with Slufter and Westmaas and then Cabauw. Now, the authors start by showing the weak part of the study: the comparison at Cabauw where LOTOS-EUROS performs better in most of the analysed statistics. In addition, in each individual section of the Results the description of the plots are very subjective, using statements like: "typical diurnal variability", "slightly overestimate", "well-pronounced", "shows the tendency", "degree of correspondence", "lower accuracy", "levels that might be difficult to reproduce", etc. If you use the numbers you have at hand, this can be shortened significantly. One more thing, you devote quite some text to plume rise, but this is not discussed nor evaluated in the Results, consider shortening the plume rise part considerably or giving it more protagonism in your results.

**Response:** We agree that for Cabauw, LE represent more accurate results in term of correlation for all heights at Cabauw for this period. We think that larger discrepancies between DALES and observations are mostly because of the low resolution of the CAMS data. Nonetheless, in term of std, DALES does a very good job at Cabauw, showing very similar std's as observed. The location of Cabauw was mostly used for the testing the model, as in this work we mostly concentrated on urban area modeling.

Despite this, we agree, that it is logically better to first show the comparison with near-surface urban area observations at Westmaas and Slufter and after show background location of Cabauw, discussing current areas of limitations and improvement that can be done. Thus, we have switched these sections (see Sect. 8.2 and 8.3). Additionally, we reconsidered the results section and updated the text to reduce subjectivity (e.g., see L528-551; L583-603).

Plume rise has not been evaluated, which is not a trivial task to do, as there are no measurements of plume rise available. However, the original publications of the parameterization include a performance evaluation, quantifying its accuracy (Gordon et al. (2018), Akingunola et al. (2018)). We included the references to these papers (See Sect. 4.1).

4. Given that the authors include biogenic fluxes and that in the Results this signal is important for the interpretation, I think they should: i) explain with more detail how are

biogenic fluxes simulated or given as offline input to LOTOS-EUROS, ii) present the spatial distribution of grasslands and forests in DALES iii) if possible and the models permit it, evaluate the DALES/LOTOS-EUROS NEE fluxes at a flux tower within the domain.

**Response:** we agree that in the LOTOS-EUROS description, the explanation of how biogenic fluxes are treated is not given. In LOTOS-EUROS, CO<sub>2</sub> biogenic fluxes, including gross primary production (GPP) (CO<sub>2</sub> uptake by photosynthesis) and ecosystem respiration (CO<sub>2</sub> release from the soil and plants), are not simulated internally and handled using external datasets. LOTOS-EUROS data which we used in our analysis were taken from the CoCO2 project. Here, LOTOS-EUROS incorporates biogenic fluxes from the VPRM (Vegetation Photosynthesis and Respiration Model) flux data from DLR (Deutsches Zentrum für Luft- und Raumfahrt, the German Aerospace Center), as offline input to account for the biospheric contribution to CO<sub>2</sub> concentrations. The input and VPRM description can be found here in chapter 5 of Denier van der Gon. H.A.C et al, Deliverable report D2.2 Prior data 2021 documentation report, CoCO2 project: <https://coco2-project.eu/node/365>. We have added this to the main text (see L467-471).

As suggested, we have added a figure showing the spatial distribution of grasslands and forests used by the Ags scheme in DALES (see L175-177):

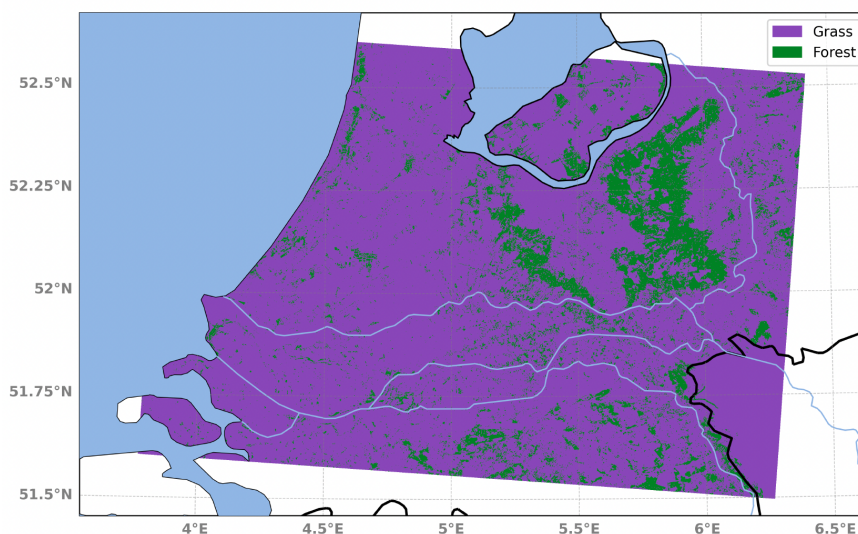

A direct comparison between NEE from LOTOS-EUROS and DALES is not possible in the current setup. LOTOS-EUROS does not provide the NEE contribution to CO<sub>2</sub> or biogenic fluxes as separate outputs. Similarly, DALES does not output biogenic fluxes separately. The NEE presented in the paper represents the NEE contribution to CO<sub>2</sub> mole fractions rather than the actual fluxes. Further validation of NEE and individual biospheric flux components in DALES is planned for a follow up study, as it requires modifications to the setup and output procedure.

5. As a GMD paper and given that one of the objectives of the paper is to "Document" the downscaling of the emission inventory, I think the authors should provide clear links to function names and modules in the code and give an overall idea of how the



preprocessor was constructed. For example in line 141, the authors write: "The workflow is structured as a comprehensive program with several stand-alone modules, each responsible for different aspects of emission data processing". So I suggest you present an overview of the program and those modules that you are referring to.

**Response:** Yes, we agree that providing an explanation of the modules would improve clarity. However, we chose not to include this discussion in detail to keep the paper concise and focused on the key findings. The full description of all modules is available in the GitHub repository ([https://github.com/ruisdael-observatory/ghg\\_emission\\_inventory\\_workflow](https://github.com/ruisdael-observatory/ghg_emission_inventory_workflow)). Based on this, we decided to add names of modules in the main text (e.g., L302) but referring to the metadata information described in the GitHub documentation of the workflow. In the text, we have also included the link to the repository at the beginning of the section to ensure accessibility to the full program (see L300-301).

Specific comments:

L124: define E-PRTR, not done previously

**Response:** The E-PRTR (European Pollutant Release and Transfer Register) is a publicly accessible database that provides information on pollutant emissions from industrial facilities across Europe. We have now included its definition in the text (see L132–133).

L134: the 100m spatial res. is for tracer transport but not for resolving turbulence? not clear since model is not described first.

**Response:** The 100 m spatial resolution refers to the LES grid used in our study. This resolution is applied both for tracer transport and for resolving turbulence.

L148-149: "1316 out of 1914" add a percentage here.

**Response:** Agreed. We have added that ~68% of the data contain gaps in plume parameters and have specified this in the main text (see L307-308).

L156: I suggest to merge this two lines with the previous paragraph. In addition, what do you mean with "cohesive"?

**Response:** We agree and merged these lines with the previous paragraph. The word "cohesive" in this context means "complete". For clarity, we have replaced "insufficiently cohesive data" with "incomplete data" (see L314).

L165: "In essence" may be "originally" fits better?

**Response:** Agreed. We have replaced "In essence" with "originally" in the main text (see L323).

L167: Can you show an example of this separation on a Map? It will be informative to show the reader what is the output of this. Sufficient as SupFigure.

**Response:** We appreciate the reviewer's suggestion and agree that visualizing this separation would be informative. However, at the LES grid resolution of 100m, individual point sources are barely distinguishable (see the figure below, which shows only point sources).

Instead of adding an additional figure, we have expanded the description in the text to highlight that the main clusters of point sources within our domain are concentrated around Amsterdam (including the port of IJmuiden) and Rotterdam, particularly along the harbor and port zones. Additionally, we now specify that the ratio of point source to area emission contributions to total CO<sub>2</sub> emissions in the simulation domain is approximately 55%/45%, with point sources being the dominant contributor, as expected.

This discussion has been added to the main text (see L341-348). The figure below illustrates these clusters with red rectangles:

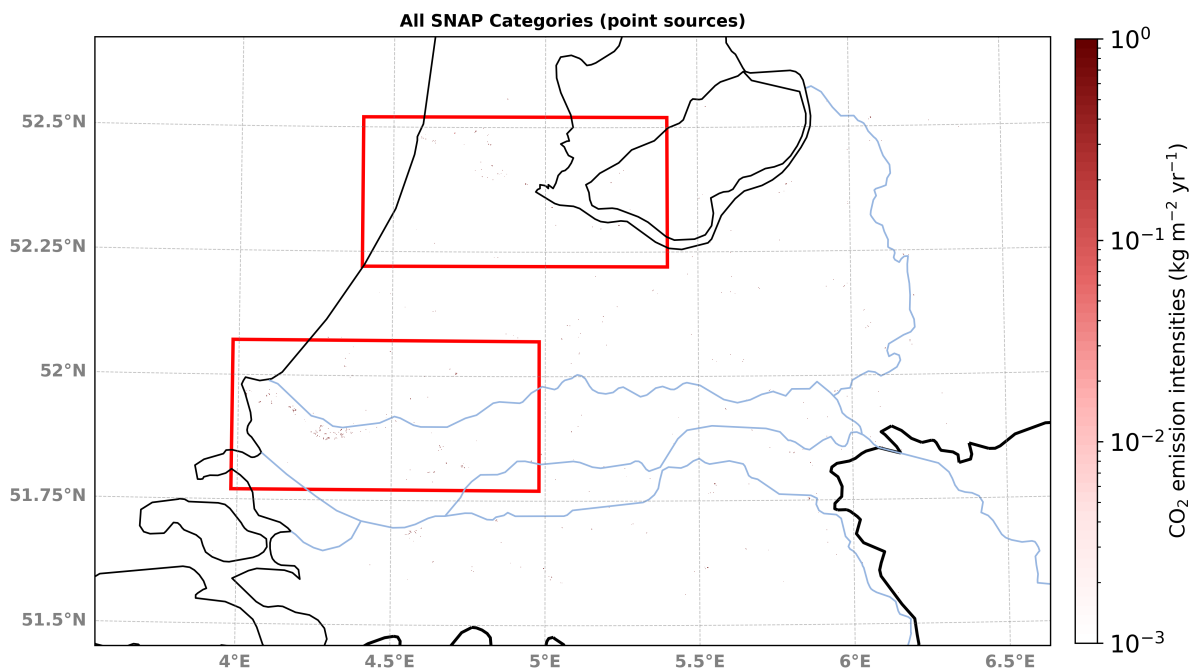

L169: "gpkg" is this a specific format in a given programming language or platform, specify.

**Response:** GeoPackage (GPKG) is an open, standards-based format for geospatial data defined by the Open Geospatial Consortium (OGC). It is a lightweight, platform-independent SQLite database designed to store vector features, raster maps, and related metadata in a single file. Using this format enables more accurate and efficient geospatial data processing by ensuring consistent spatial referencing, minimizing data loss during format conversions, and supporting complex spatial queries directly within the database. In our program, the use of the GPKG format was adapted from QGIS code to Python to enable more precise processing of spatial data. GeoPackage format has been specified in the main text (see L329-331).

L175: What about mass conservation in this procedure? Did you check that?

**Response:** yes, the mass conservation has been assessed and the difference between original data and processed is within permissible error (<5%). We make use of a mass fixer.

L176: This line reads like a caption.. I suggest removing it and start with the next paragraph. I don't think you need this sentence here.

**Response:** Agreed. We have removed this line and started with the next paragraph as suggested (see L337).

Figure 1. Can you point the reader to what do you consider as point sources and area emissions on the Figure? For example, for SNAP 2: Res. and Commercial. Are these considered point sources or area emissions? SNAP 5 is quite vague: Fossil Fuels? most of these can fall in SNAP 5. Given the level of detail you are aiming, I suggest to be more precise here. These SNAP categories represent individual tracers in DALES? Not clear.

**Response:** No, in DALES, we do not currently have sectorial split in the setup and individual tracers for each category of anthropogenic emissions, as analyzing individual sources is beyond the scope of this study and would require additional investigation. Instead, DALES incorporates the sum of anthropogenic emissions from all SNAP categories. However, we agree that it would be clearer to specify which of the presented emissions are considered point sources and which are classified as area emissions. We have done it in the text, describing areas where the majority of point sources are located.

In the text we added: It is important to mention that the Rotterdam harbor, including its port infrastructure, and the Amsterdam area, together with the IJmuiden port, have the highest density of point source emissions within the simulation domain. The majority of point sources fall into the SNAP1 (power generation) and SNAP3 (industrial combustion) categories, as these sectors rely on large stationary facilities, such as power plants, refineries, and industrial manufacturing sites. The point source/area emission contribution ratio to the total CO<sub>2</sub> emissions at the simulation domain is ~55%/45%, with point sources having the larger contribution, as expected (see L343-349).

Also, we agree that it is not clear what emissions are included in SNAP 5, as in the figure this category named as "Fossil Fuel". In the Table 1, it is more clearly explained. SNAP 5 category is oil/gas extraction and distribution emissions, so it includes emissions from the extraction, processing, and distribution of oil, and gas. We have corrected this in the figure to make it more clearer for readers (see Table 1 and Figure 4).

L187: "responsible for the majority" how much, add %.

**Response:** from our estimation, this represents approximately 70% of total national anthropogenic emissions in the Netherlands (109 Mt/year out of ~160 Mt/year for 2018). We have included this information in the main text (see L355).



L188-190: This is not clear. Are there less sources in the northeast? Why only for evaluation of the model? Are you only simulating when the wind comes from the NE? Please clarify.

**Response:** The simulation can be performed for any domain within the Netherlands. However, for model evaluation, we selected a specific analysis period based on meteorological conditions and wind direction. This choice aimed to minimize the influence of emissions from neighboring countries, such as Germany, which are not included in the setup, ensuring a more controlled comparison.

Figure 2. I suggest to have Fig 1 and Fig 2 in one panel together. You can have Fig 2 as a large panel above the small panels of Fig 1. This will improve the visualization. "These emissions maps" should be singular instead?

**Response:** Agreed. We have merged these figures together in Figure 4 (see L350-351):

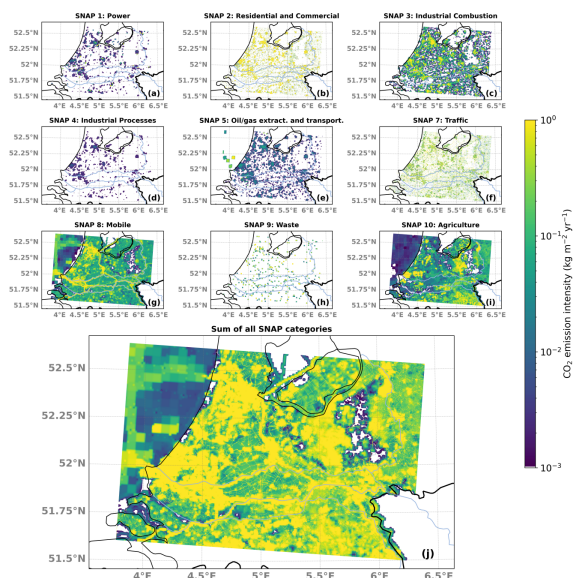

L194: So, in the model the plume rise mechanism is always activated, but for area emissions the bottom and top are set to fixed values, right? What is the interaction between plume rise and “natural buoyancy”? As I think of plume rise in emissions, their rising is due to temp gradients of the emissions and surrounding air. But this is not the case for area emissions... clarify please.

**Response:** Yes, that is correct. The parameterization of plume rise for point sources is based on the difference between the plume's characteristics and the surrounding meteorological parameters, which determines the residual buoyancy. This buoyancy is then used to estimate the plume rise height (the height where residual buoyancy = 0). For area emissions, we cannot apply the same parameterization since we lack specific plume characteristics. In most cases, area emissions are released at the surface (the first LES layer). However, for certain categories with a vertical component, such as SNAP 8 (where ship stacks contribute to emission distribution), we apply a fixed plume top of 150 m, based on Brunner et al. (2019). Therefore, in the current setup, plume rise for area

emissions does not depend on buoyancy. This explanation has now been included in lines L222-235.

L196-197: This contradicts the sentence in line 193 and 194. I suggest you describe the plume rise for point sources first and then for area emissions. It is confusing as it is now.

**Response:** We agree with the reviewer's suggestion. Both L193-194 and L196-197 discuss the vertical distribution of area emissions. Specifically, L196-197 clarifies that area emissions from SNAP 5, 7, and 10 are applied at the first LES layer, as they are surface emissions, while emissions from other SNAP categories are redistributed between 0 and 150 m. To improve clarity, we have reordered the text to better distinguish the plume rise applied for area emissions and point sources. This clarification can be found in lines L222-235.

L200: The temporal disaggregation is for all categories? only for traffic? do all have a diurnal cycle or rush hour? I don't think so. How do you deal with Agriculture and Industrial processes for example?

**Response:** Temporal disaggregation is applied individually for each emission SNAP category based on EDGAR coefficients, which are derived from the long-term statistics on the temporal variability of various emissions. For example, for SNAP 7 (traffic emissions), the coefficients account for variations between rush hours and calm traffic hours, as well as diurnal, weekly (workday/weekend), and seasonal cycles. However, not all categories follow a clear diurnal cycle. For categories such as agriculture and industrial processes, temporal disaggregation is based on general temporal emission patterns rather than specific rush hour variations. The details of how EDGAR temporal profiles have been obtained can be found in TNO (2011) and Crippa et al. (2020).

*TNO: Description of current temporal emission patterns and sensitivity of predicted AQ for temporal emission patterns, Tech. rep., EU FP7 MACC deliverable report DD-EMIS1.3, TNO, Princetonlaan 6, 3584 CB Utrecht, The Netherlands, [https://atmosphere.copernicus.eu/sites/default/files/2019-07/MACC\\_TNO\\_del\\_1\\_3\\_v2.pdf](https://atmosphere.copernicus.eu/sites/default/files/2019-07/MACC_TNO_del_1_3_v2.pdf), hugo Denier van der Gon, Carlijn Hendriks, Jeroen Kuenen, Arjo Segers, Antoon Visschedijk. For: EU FP7 MACC (Monitoring Atmospheric Composition and Climate), Grant agreement no.: 218793; coordinator: Dr. Adrian Simmons, ECMWF, UK, 2011.*

*Crippa, M., Solazzo, E., and Huang, G., e. a.: High resolution temporal profiles in the Emissions Database for Global Atmospheric Research, 840 Scientific Data, 7, 121, <https://doi.org/10.1038/s41597-020-0462-2>, 2020.*

L202-203: you refer several times to the model description on subsequent section. I suggest you describe DALES first and then its inputs (emissions).

**Response:** We agree with the reviewer's suggestion. To improve clarity, we have reordered the sections to first describe the DALES model and its emission module (see Sect. 3) before introducing the downscaling workflow (see Sect. 5). Additionally, we now discuss the point source plume rise mechanism earlier in the text (see Sect. 4).

L210-211: "Data have 100 × 100 m<sup>2</sup> resolution are freely available from the CBS website" something wrong in this sentence: "Data with 100 x 100 m<sup>2</sup> resolution are freely...."

**Response:** Agreed. We have corrected the sentence to: "Data with 100 × 100 m<sup>2</sup> resolution are freely available from the CBS website." (See L374).

L222: "target level" add "target level (100m)"

**Response:** Agreed. We have added this (see L384).

L225-230: this sounds more like Discussion.

**Response:** Agreed. We have kept this section but shortened it and removed the final paragraph to maintain focus and avoid it sounding too much like a discussion. (see L387-391).

L231-234. With Figure 3 I am convinced, no need to state this in the Methods. In addition, so far I have not seen any reference to the downscaling code or repository.

**Response:** Agreed, we removed the last paragraph of this section (see L391).

L255: What about autotrophic respiration

**Response:** Yes, the Ags scheme includes autotrophic respiration, which is the respiration of plants - which dominates in the NEE flux during night time. It should depend on a constant R<sub>10</sub> (see <https://link.springer.com/article/10.1007/s10584-006-9182-7>, Equation 12). For clarity, we have specified this in the main text (see L158).

L271-272: Do you also need a high resolution map of the forests in NL? Im thinking about the big parks within cities and off course the Veluwe.

**Response:** Yes, the land surface model (LSM) input includes a field that distinguishes between two ecosystem types: grass and forest. This allows the model to identify grid points covered by grass and those covered by forests, including large parks within cities. A map illustrating this distinction has been added to the main text (see Figure 1 in L176-177).

L286: van Genuchten? what is that?

**Response:** Van Genuchten model parameters are used to describe soil water retention and hydraulic properties (see Vilà-Guerau de Arellano et al. (2015)). This explanation has been added to the main text (see L195-198).

Vilà-Guerau de Arellano, J., van Heerwaarden, C., van Stratum, B., and van den Dries, K.: Atmospheric Boundary Layer: Integrating Air Chemistry and Land Interactions, Cambridge University Press, 2015.

L294: which workflow? the previously described emission downscaling pipeline? Be specific here.

**Response:** Agreed. We have excluded this sentence from the main text as we have reordered the sections (see L210-215).

L301-302: How many vertical layers does the model have?

**Response:** In this study, the model uses 128 vertical layers, extending from the ground to approximately 6 km. The reviewer may be referring to  $K_{\text{emiss}}$ , which represents the highest layer where emissions are applied: LES layer corresponds to 150 m for area emissions and the plume top height (calculated interactively) for point sources. Nevertheless, we have added the number of vertical layers used in DALES to the setup description for clarity (see L411).

L310: you meant point sources?

**Response:** Yes, by 'individual sources' we mean point sources. We have clarified this in the main text (see L229).

L316: this line is not needed I think.

**Response:** Agreed. We have excluded it.

L331: why not just say negative...?

**Response:** Yes, agreed. We also decided to shorten this part, as the plume rise mechanism is already described in the reference papers (see Sect. 4.1).

L341:  $u_{\text{zhj}+1}$  and  $u_{\text{zhj}}$  are the wind speed using the three components of the wind ?  $u$ ,  $v$  and  $w$ ?

**Response:** Thank you for pointing this out. Indeed, it was not specified but is mentioned in the reference paper (Gordon et al., 2018). In the parameterization, only the total horizontal wind speed is considered, so  $U$  is calculated as  $\sqrt{u^2 + v^2}$  averaged over the layer. The  $w$ -component is not considered. We have now clarified this in the main text (see L251-254).

L394-395: Well. I don't understand why you took a lot of effort defining point sources, area sources, downscale, regrid, etc, to have all as one tracer in DALES. I really was expecting to see tracers per SNAP category. This makes me think, why all the effort of Sections 2.1 and 2.2 to group all anthropogenic tracers together! Now the way you are setting up the experiments suggest you are more interested in the biogenic signals.

**Response:** As discussed earlier, we agree that having individual tracers for each SNAP category would be beneficial for analyzing their respective contributions. However, this level of detail goes beyond the scope of the current study and would be more suitable for a separate investigation.

That said, we disagree with the notion that processing point sources, area emissions, and individual SNAP categories separately while combining all processed emissions into a single tracer is meaningless. All the details discussed in Sections 2.1 and 2.2 are fully accounted for in this single tracer, as they all contribute to the quality of the overall emission component as well as the separation between the aggregated anthropogenic and biogenic contributions to CO<sub>2</sub>.

In this work, our goal is to assess the ability of a high-resolution (LES) model to reproduce CO<sub>2</sub> measurements in the Netherlands. In addition, we aim to determine what fraction of the observed signal is due to anthropogenic vs. biogenic contributions. To achieve this, we need the spatial detail of DALES to ensure accuracy. Specifying the anthropogenic signal into its different components would be a next step, which the current setup allows, but this is not the focus of this paper.

Regarding biogenic fluxes, we acknowledge that CO<sub>2</sub> exchange is a crucial part of the carbon cycle, as demonstrated in the results section. Thus, to improve clarity and show its contribution, we have included the CO<sub>2</sub> anthropogenic emission tracer in Figures 8 and 10 (See L529-530 and L584-585).

L404-405: Why? this is also mentioned before. Be specific why this is the case. Not clear.

**Response:** Overall, these conditions allow separating the contributions of anthropogenic and biogenic CO<sub>2</sub> sources by providing a stable meteorological environment with minimal interference from the strong winds or turbulent mixing which are good for the validation. The stable summer conditions, characterized by clear skies and relatively warm temperatures, led to pronounced diurnal variations in the boundary layer height. During early morning hours, weak atmospheric mixing resulted in the accumulation of CO<sub>2</sub> near the surface, enhancing the detectability of both anthropogenic emissions and biogenic fluxes.

L406: In other words, you do like a 1-day spinup?

**Response:** Yes, but upon reconsideration, excluding the entire day was decided to be an exaggeration. Therefore, we changed the period by including the June 25th in the analysis but excluding the period from 23:00 to 06:00 UTC of each day during the considered period. This is acceptable as DALES is influenced not only by the DALES initialization (that is first few hours) but also by the HARMONIE spin-up and inaccurate simulation of the night-time stable boundary layer conditions at 100m resolution during those hours. Thus, we have rewritten this paragraph (and subsequent analysis) (See L421-430).

L420: I suggest merging this paragraph with the one above

**Response:** agreed (See L435-450).

L424: merge with previous paragraph... same topic..

**Response:** agreed (See L435-450).

Section 5.2 how are biogenic emissions treated in LOTOS-EUROS? The background is also CAMS?

**Response:** We agree that this is not explained properly here. Yes, LOTOS-EUROS also uses CAMS data for the boundary conditions of chemistry. Regarding biospheric fluxes, these are not simulated internally in LOTOS-EUROS but read in from external datasets. In the CoCO<sub>2</sub> project setup, biogenic fluxes from the VPRM (Vegetation Photosynthesis and Respiration Model) dataset, provided by DLR (Deutsches Zentrum für Luft- und Raumfahrt, the German Aerospace Center), are used as offline input in LOTOS-EUROS. We have added this to the text (see L468-473).

Figure 6. add the names of the stations somewhere on the Figure.

**Response:** Agreed, the names of the stations have been added to the caption of this figure (see Figure 7).

L483: The CO<sub>2</sub>bg was not really computed by DALES right? Just taken from CAMS and transported in DALES?

**Response:** Yes, this is correct. CO<sub>2</sub>bg values are taken from CAMS, interpolated onto the LES grid, and transported by DALES as a passive tracer.

L484-485: Using anomalies instead of full simulated mole fractions. So, why do you include a background? Why not full mole fractions and leave the observations untouched? You could also just compare enhancements.. Not clear why this is selected.

**Response:** We disagree with the reviewer's suggestion because the background concentrations in our study are not constant. While the background (BG) has variability, this variability is somewhat suppressed due to the 6-hourly temporal resolution of the input CAMS data, but it is still considered. Since this work focuses on variability rather than the mean-level offset caused by the background or full mole fraction differences in the model, it makes sense to plot the deviation from the mean for BG, CO<sub>2</sub>sum, and LOTOS-EUROS CO<sub>2</sub> time series.

It is important to note that for almost all the statistics presented in subsequent figures, extracting the mean level does not affect the assessment of variability. Only the Mean Bias Error (MBE), which is related to the mean level, is affected, as this measure evaluates the mean level. Therefore, for statistical analysis it makes sense to include the full mole fraction only due to MBE. For this reason, we decided to plot  $\Delta\text{CO}_2$  for CO<sub>2</sub>bg, CO<sub>2</sub>sum, and LOTOS-EUROS CO<sub>2</sub> at figures 8 and 10.

L486-487: first time NEE comes up. I assume this is the difference between soil resp and gpp in DALES. Not clear how is it for LOTOS-EUROS.



**Response:** Yes, NEE (Net Ecosystem Exchange) is the sum of soil respiration and NPP (Net Primary Production), with CO<sub>2</sub> photosynthesis being the negative component. In general, NEE is a flux, but here, since we analyze mole fractions, NEE represents the contribution of the biosphere to the local CO<sub>2</sub> mole fraction, extracted from the CO<sub>2</sub>sum tracer. As mentioned earlier, unfortunately, we cannot validate or compare NEE between LOTOS-EUROS and DALES, as fluxes/NEE contributions are not available in the LOTOS-EUROS output (since LOTOS-EUROS does not have separate tracers for the different contributions to CO<sub>2</sub> mole fraction as in DALES).

L488-489: Why you do a spatial operation to solve for temporal dynamics? Not clear. Maybe I'm not getting what you are doing. I think what you want to say is: "DALES is sampled at the Cabauw tower interpolating horizontally and vertically to match the Cabauw measured CO<sub>2</sub> profile." correct?

**Response:** Yes, this is correct. We have reconsidered this sentence to make it clearer. (See L580-584).

L490-495: I would expect some statistics like MBE, RMSE, R<sup>2</sup>, instead of this subjective description.

**Response:** Agreed. We have rewritten this paragraph based on updated Figure 8 and decreased the level of subjectiveness (See L584-605).

L501-503: see my comment above about the CAMS selection as background.

**Response:** As mentioned earlier, the bias analysis of CAMS EGG4 has been conducted by ECMWF, and biases are estimated to be up to 2.5%, with an average of around 1%. Additionally, due to the lower temporal resolution of CAMS, we anticipated some level of under or overestimation during the intermediate hours (because of linear interpolation).

L509-511: biases, you can quantify this, I suggest doing it. Overestimation by how much? you have numbers, use them.

**Response:** The biases have been analyzed and discussed in the ECMWF report. According to their findings, the biases in the CAMS EGG4 data can reach up to 2.5%, with an average bias of approximately 1%. We have provided these values based on their analysis to ensure consistency with the available analysis, presented in the ECMWF report (see L536-538).

L513: what is this? vertical component? if this is not to blame why do you mention it? Confusing.

**Response:** The "vertical component" refers to the 3-D forest structure. However, we agree that it is not directly relevant here and we have omitted from the main text to avoid confusion.

L515-518: Sounds like methods. Also, you are bringing the statistics quite late in the Results.

**Response:** Agreed. We have added a methods subsection that describes the statistical methods used to evaluate the models against observations (See L474-487).

L519: Bootstrap of MAE? Not clear why this is done. Not mentioned in the Methods.

**Response:** We have added Bootstrap method description to the methods subsection (See L474-487).

L521-522: It is not surprising that CO<sub>2</sub>sum is better than CO<sub>2</sub>bg.. I would not even report this. It is expected.

**Response:** agreed. We have omitted this from the text.

L525-526: its quite surprising that the mesoscale model explains 12% more of the variability than DALES. Why then going to LES scales ? (I know you show this later, but during the first reading I was wondering about this because the good DALES performance is presented after this).

**Response:** We agree with the reviewer's suggestion to first present the comparison to urban Westmaas and Slufter, followed by the rural Cabauw tower measurements. Currently, in the main text, the comparisons to urban Westmaas and Slufter measurements come before the evaluation against rural observations from the Cabauw tower (see Sect. 8.2 and 8.3).

L520-535: most of the statistics show LOTOS-EUROS is better than DALES.. why then using the LES? (Again this to show what the reader thinks when this is presented first). Additionally, I think you should fix the background and make the comparison using total mole fractions and not anomalies. Or explain clearly why the selection of the anomalies for this analysis.

**Response:** In this study, the main focus is to assess the variability of CO<sub>2</sub> mole fractions rather than the absolute values. By using deviation of the mean mole fractions, we aim to present the fluctuations in CO<sub>2</sub> concentrations, which is central to our analysis. Including the mean level is not necessary in this case, particularly in time series plots, where we are more interested in understanding the temporal variability, including contributions from anthropogenic emissions and Net Ecosystem Exchange (NEE). Thus, the plotting of deviations is consistent with the primary objective of our study.

Figure 8. Why this plot shows full mole fractions? I suggest to be consistent either with anomalies like in Fig 7 or total mole fractions like this one.

**Response:** We appreciate the reviewer's comment. However, we respectfully disagree with the suggestion. As we mentioned early, in this study, the main focus is to assess the

variability of CO<sub>2</sub> mole fractions rather than the absolute values. By using deviation of the mean mole fractions, we aim to present the fluctuations in CO<sub>2</sub> concentrations, which is central to our analysis. Including the mean level is not necessary in this case, particularly in time series plots, where we are more interested in understanding the temporal variability, including contributions from anthropogenic emissions and Net Ecosystem Exchange (NEE). Thus, the plotting of deviations is consistent with the primary objective of our study.

L539: you meant: "higher performance"? maybe change "higher" for "better"?

**Response:** Agreed. However, since we rewrote this paragraph, it is no longer included in the text.

L541-542: what if you compare gradients in both models? Maybe DALES is better than LOTOS here?

**Response** No, the gradient analysis shows similar R<sup>2</sup> and correlation at Cabauw.

L546-549: this sounds like methods, Maybe you can add a subSection in Methods called: "Model evaluation at atmospheric stations" and there tell the reader how do you sample DALES for each station and the height used.

**Response:** We have added a subsection outlining the methods used for statistical analysis (see L474-487).

Figure 9. Here it would be very interesting to have one single tracer for only anthropogenic emissions. You have one for NEE and not for the SNAP categories for which you have done most of the efforts processing data. With this you can easily argument that these stations are more affected by anthropogenic sources than Cabauw. The three tracers you have: \*sum, \*NEE and \*bg don't allow to make such analysis.

**Response:** We have added the AE contribution time series in Figures 8 and 10.

L563: "Anthropogenic emissions dominate in the CO<sub>2</sub> variability in this location", you could show this clearly if you would had an anthropogenic emission tracer. Now, is difficult to see if the model gets that.

**Response:** Agreed.

L551-576: A lot of subjective statements: slightly, typical, well-pronounce, etc. Only once numbers are used (L560).

**Response:** Agreed. We have rewritten the discussion for both Cabauw and Westmaas+Slufter and significantly reduced the level of subjectivity (see L530-555 and L584-605).

L578-579: Again, this (CO2sum better than CO2bg) is not surprising. I would not even report this.

**Response:** Agreed. We have excluded the comparison with CO2bg from this discussion (see L530-555 and L584-605).

L587-592: Not clear what the message is in this paragraph. First you refer to both models being off with low R2, then you refer to the normalized std being better in DALES. Then you go back to both models being off with a high RMSD. Think about a message and argument it. Now this paragraph is difficult to follow.

**Response:** agree, we rebuilt this paragraph to make it more easy to follow, first explaining difficulties (see 566-574).

Section 6.3: After reading this section, there was no clear message in the end. I had to go back and re-read to end up with no conclusive statement that summarizes the pros and cons at Westmaas and Slufter. You could refer to the difficulties the models have at Slufter, as you do now, but also make a conclusive statement for Westmaas. DALES was better there, so you can highlight this at the end of the Section.

**Response:** We agree with the reviewer's suggestion and have rewritten this paragraph, highlighting the strengths of DALES in reproducing CO<sub>2</sub> variability at Westmaas and discussing the challenges observed at Slufter (see L574-578).

L598-600: I had to wait 26 pages to see this. I think this should be presented earlier. Not sure if it is because the paper is too long, that it certainly feels quite late. I was wondering about the Anthropogenic emissions and their contribution from the beginning of the Results.

**Response:** We agree with the reviewer that the anthropogenic emission contribution should be introduced earlier. Therefore, we have added the AE contribution in Figures 8 and 10.

Figure 11. Nice plot. Some things to clarify:

- the % is taken from the full mole fraction or from dCO<sub>2</sub>?

**Response:** Yes, the percentage is taken from the full mole fraction of CO<sub>2</sub>. We have clarified this in the caption of Figure 12.

- not clear if dCO<sub>2</sub> is from the model or from the obs?

**Response:** dCO<sub>2</sub> is from the model. Observations are not shown here, as individual components cannot be derived from observations.

- if dCO<sub>2</sub> is based on the model, then consider adding information on the dCO<sub>2</sub> from the observations. You could do this by subtracting the background from the observations, making sure you have bias corrected CAMS if needed. See my comments above about this.

**Response:** Unfortunately, this is not possible, as the plot is designed to separate CO<sub>2</sub> contributions into its components, which cannot be done for the measurements. However, the comparison between observed and modeled dCO<sub>2</sub> is already presented in the plots comparing modeled vs. observed CO<sub>2</sub> mole fractions as deviations from the mean (see Figures 8 and 10).

- I don't understand why you first use anomalies, then for the scatter plots you use full mole fractions and now, deviations from background. Why not anomalies here? Why dCO<sub>2</sub> since the beginning? Please argue this.

**Response:** We subtract the background in this case to show the contribution of individual components to the total CO<sub>2</sub> mole fraction. In previous analyses, we focused on variability, which is why we initially plotted deviations from the mean for both observations and models. For statistical analyses, we used the full mole fraction since statistical metrics assessing variability are not affected by absolute values (only for MBE).

L628-629: This is true. But for making this statement you should show you are really doing this. I did not see a map (100x100m) of vegetation for your domain, it is not clear if you considered autotrophic respiration in DALES and there is no validation of NEE from DALES with eddy fluxes somewhere in NL. As you presented the Introduction and the Methods, the reader assumes the focus is on anthropogenic emissions and in the results there is a shift in focus to NEE.

**Response:** We agree that validating the biogenic fluxes from DALES would be a valuable addition, especially given their potential influence on CO<sub>2</sub> concentrations. While this is beyond the scope of the current study, we plan to address it in future work.

we have added a map of vegetation types to the paper (see Figure 1). However, validating biogenic fluxes is not feasible within our current setup, as our focus is on CO<sub>2</sub> concentrations rather than fluxes, which would require adjustments to the output procedure.

Regarding autotrophic respiration, it is accounted for in the Ags scheme. The Ags scheme has been previously evaluated (e.g., <https://www.nature.com/articles/ngeo1554>), though not specifically in an LES framework.

Section 7. What about the perspective of LES for atmospheric inversions? something to mention here? You can speculate on optimizing specific SNAP categories and use this as a benchmark for what the country or city is reporting (bottom-up).

**Response:** We agree with the reviewer that LES has strong potential for atmospheric inversions and can serve as a benchmark for optimizing specific SNAP categories and comparing bottom-up emission reports. We have added a paragraph discussing this perspective in the main text (see L724-727).

L645-649: I doubt higher resolution will be the main solution to the CAMS background. To get continental CO<sub>2</sub> signals properly you need at least to optimize the fluxes (inversion) and have a good atmospheric transport. The CAMS version you are using doesn't do that, I believe so.. not clear either.

**Response:** We thank the reviewer for this comment. We agree that simply improving resolution may not be sufficient to properly capture continental CO<sub>2</sub> signals. To accurately represent these signals, it is essential to optimize fluxes using inversion techniques, along with a robust atmospheric transport model.

In our study, we used the CAMS EGG4 delayed mode, which incorporates bias corrections. This version addresses some of the limitations by adjusting for known biases in the model output. However, flux optimization is not performed within the CAMS EGG4 dataset. While other CAMS products do include flux optimization, their spatiotemporal resolution is lower. We agree that a more comprehensive approach, involving flux inversions and improvements in atmospheric transport, would significantly enhance the accuracy of CO<sub>2</sub> signals.

L689: access or link to code for downscaling, not seen so far.

**Response:** yes, the link to downscaling code has been added to the emission section (see L300-301).

L704. "also identified limitations of the current framework" like?

**Response:** yes, we agree that the phrasing is not well formulated. We have rephrased this sentence in the main text: Besides, we identified limitations in the current framework, such as larger deviations from observations at the Cabauw rural location and challenges in simulating coastal environments, which will require further improvement in future developments. (See L759-761)

L717: "with inversion techniques" This should be mentioned earlier in the Perspective section. How and what is the feasibility and also what type of information can it bring.

**Response:** Thank the reviewer for the suggestion. We agree and have now addressed the role of inversion techniques earlier in the Perspective section, discussing their feasibility and potential to improve CO<sub>2</sub> flux estimation. Specifically, we highlight how inversion methods can enhance emission quantification and support the independent validation of national inventories (see L724-727).

L718: "sub-scale processes" you meant sub-grid? also give examples.



**Response:** We agree, and we have rewritten the sentence as follows: "Furthermore, by delivering detailed information on sub-grid processes, such as turbulence, boundary layer dynamics, and localized emission dispersion, DALES can enhance parameterizations in larger-scale models through nesting, contributing to more accurate regional climate predictions." (see L774-777).

L720-721: "will support more informed decision-making" How? I don't see this for the near future with a couple of days of simulations. I expect to see discussion on what are the perspectives of making longer simulations for at least 6 months so that they are relevant to policy.

**Response:** We agree that the current phrasing may not fully capture the potential. By 'supporting more informed decision-making,' we refer to the possibility of using LES results to downscale larger-scale models (such as LOTOS-EUROS) in the future, potentially with the assistance of AI techniques (we have added this example at L777). This approach could improve the accuracy of long-term forecasts, which would be more relevant for policy development. Although the current simulations are short-term, extending them to several months would provide more valuable data for policy-related decisions. With advancements in computing power and storage, extending the simulation timeframe to longer periods could become feasible.

Code and data availability: the offline workflow repo should be referenced in the main text. The DALES 4.4 repo should also be reference earlier.

**Response:** agreed, we have added these references to the main text (see L141 and L300-301).

Table A1. I suggest you add this on the main text, together with a description if they are considered point or area sources.

**Response:** Agreed. We have moved this table to the main text (see L118-119).
